# Supplementary material for: The R251K Substitution in Viral Protein PB2 Increases Viral Replication and Pathogenicity of Eurasian Avian-like H1N1 Swine Influenza Viruses
Source: MDPI journal article supplement (doi:10.3390/v12010052), 2020-01-02
Supplement: s1 [file s1]

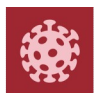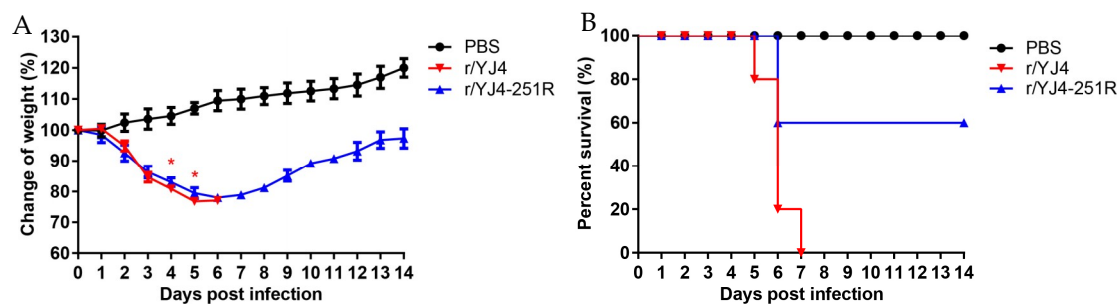

**Figure S1.** Weight changes and survival rates of mice infected with r/YJ4 and r/YJ4-251R viruses. Six-week-old female BALB/c mice were inoculated intranasally with r/YJ4 and r/YJ4-251R viruses at  $10^6$  TCID<sub>50</sub>. Body weight change rate (A) and survival rate (B) in the infected mouse were continuously recorded for 14 days. Mice with weight loss of more than 25% of their initial body weight were euthanized humanely. Significant body weight changes of the mutant virus-inoculated mice compared with YJ4 virus-inoculated mice (\*,  $p < 0.05$ ).

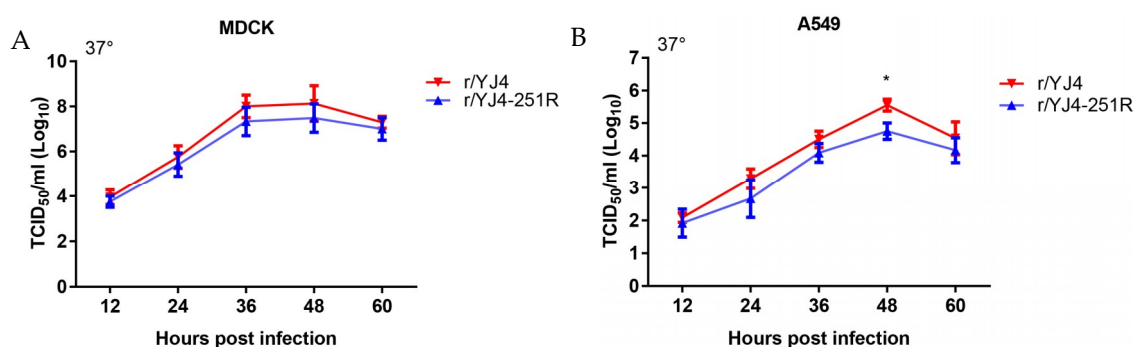

**Figure S2.** Growth Kinetics of r/YJ4 and r/YJ4-251R viruses in MDCK (A) and A549 (B) cells at 37 °C. MDCK cells (A) or A549 cells (B) were infected at an MOI of 0.01 with r/YJ4 and r/YJ4-251R viruses and cultured at 37 °C. Culture supernatants were harvested at 12, 24, 36, 48 and 60 hpi and subjected to TCID<sub>50</sub> assay in MDCK cells. Results are expressed as the means  $\pm$  SD ( $n = 3$ ) and the statistical significance was calculated using one-way ANOVA. \*,  $p < 0.05$ .
